# Supplementary material
Source: PubMed Central journal article supplement (PMC3612837)
Supplement: tlo0602_0104SD1.pdf [file tlo0602_0104SD1.pdf]

**Table W1.** HGF Concentration in the Cells.

| Cell Line | HGF (pg/ $\mu$ g) |
|-----------|-------------------|
| U87wt     | 14.18             |
| Mayo 39   | 0.00              |
| Mayo 59   | 0.00              |

U87wt, Mayo 39, and Mayo 59 cells were grown under serum starvation conditions for 24 hours and then cells were washed with cold PBS three times. Proteins were extracted using RIPA buffer containing protease and phosphate inhibitors (Calbiochem) at 4°C and proteins were quantified using Coomassie Protein Assay (Pierce Thermo Scientific, Rockford, IL). HGF was quantified by using ELISA Kit (R&D Systems, Minneapolis, MN).
